# Supplementary material for: Optimization of the direct synthesis of dimethyl ether from CO2 rich synthesis gas: closing the loop between experimental investigations and model-based reactor design
Source: Royal Society of Chemistry journal article supplement (doi:10.1039/d0re00041h), 2020-01-01

# Optimization of the direct synthesis of dimethyl ether from CO<sub>2</sub> rich synthesis gas: Closing the loop between experimental investigations and model-based reactor design

Nirvana Delgado Otalvaro<sup>a,b</sup>, Markus Kaiser<sup>\*a</sup>, Karla Herrera Delgado<sup>\*b</sup>, Stefan Wild<sup>b</sup>, Jörg Sauer<sup>b</sup>, and Hannsjörg Freund<sup>a</sup>

<sup>a</sup>Friedrich-Alexander-Universität Erlangen-Nürnberg (FAU), Lehrstuhl für Chemische Reaktionstechnik, IZNF, Cauerstr. 3, D-91058 Erlangen, Germany.

<sup>b</sup>Karlsruhe Institute of Technology (KIT), Hermann-von-Helmholtz-Platz 1, D-76344 Eggenstein-Leopoldshafen, Germany.

## Electronic Supplementary Information

### Section 2.1 Experimental setup

The experimental setup depicted in Figure 1 was used to conduct kinetic measurements and the experimental validation of model-based optimization results.

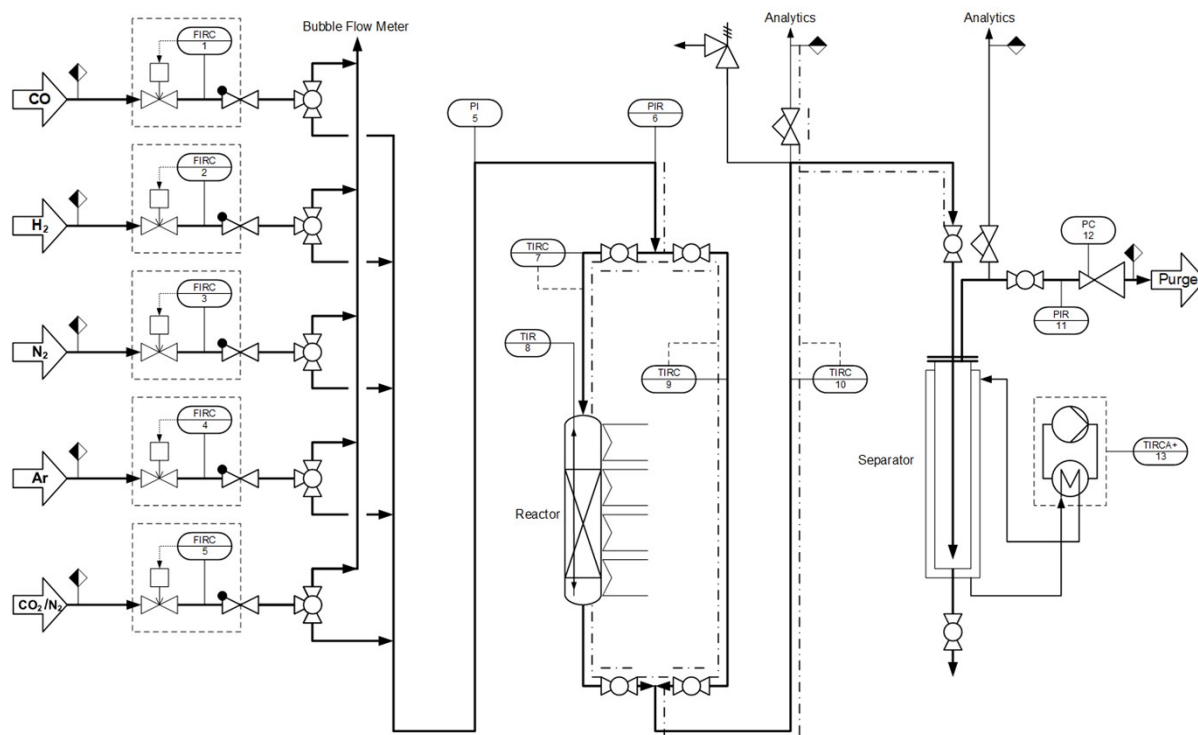

Figure 1: Flow diagram of the experimental setup.

The gas supply is regulated via mass flow controller (MFC, Bronkhorst High Tech, FIRC 1, 2, 3, 4 and 5) by using proportional-integral-derivative (PID) control.

The tube reactor consists of a vertical cylinder made of the stainless steel 1.4571. The reactor is designed for temperatures up to 350 °C and a maximal pressure of 100 bar. The thermocouple used for the temperature measurement over the reactor length is of the type K, NiCr-Ni. To ensure isothermal operating conditions the catalyst bed was diluted with SiC. Two exemplary temperature profiles measured with thermocouples along the axial direction during the experiments are shown in Figure 2 and 3.

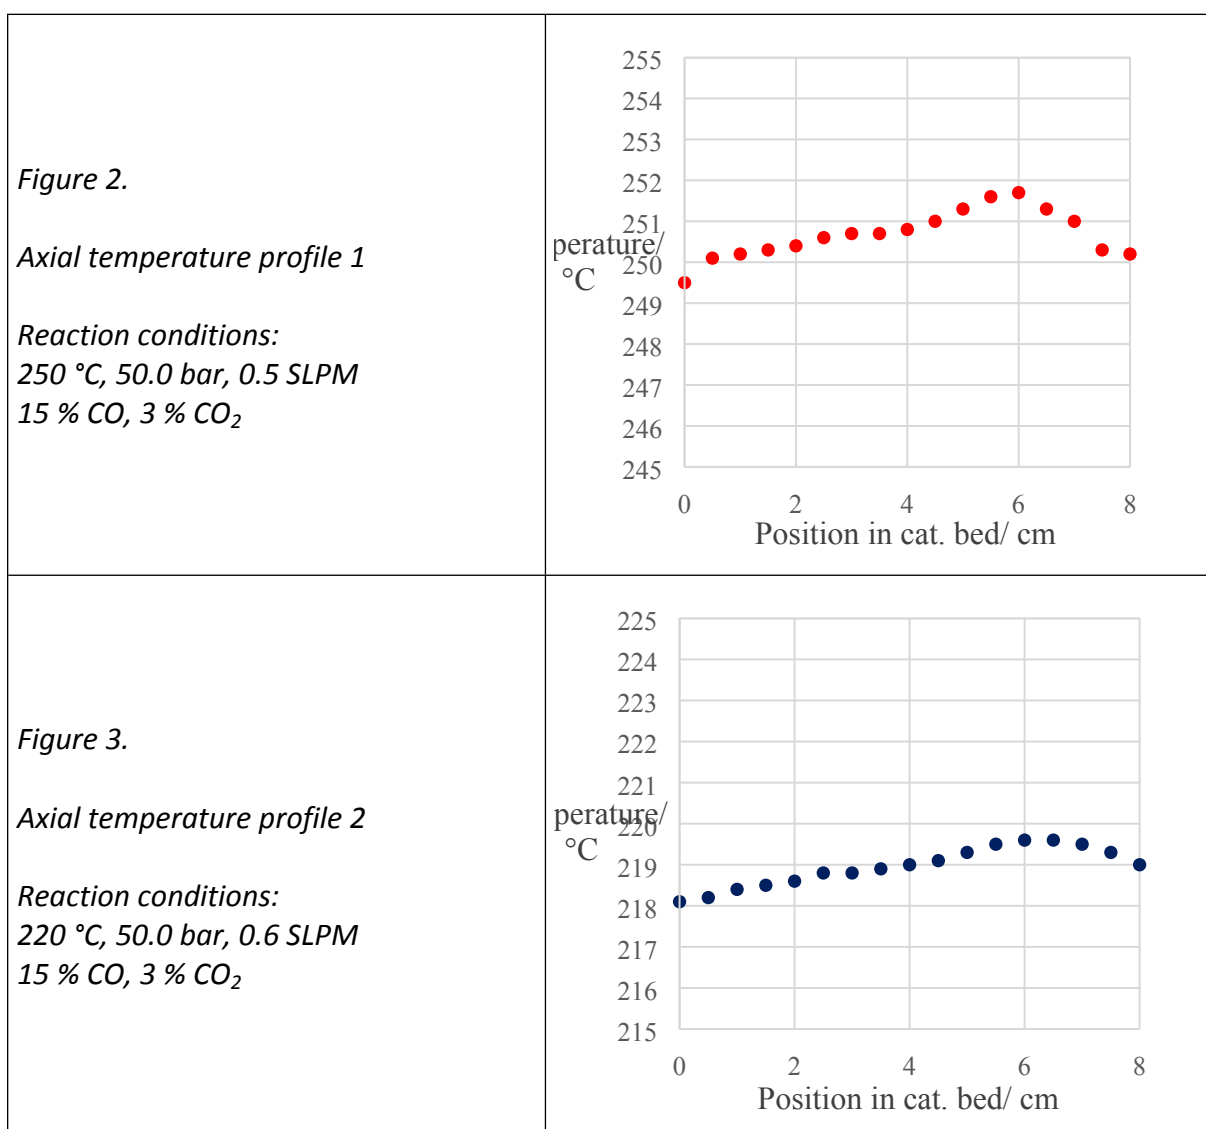

The temperature profiles were measured with a scale division of 0.5 cm for the catalyst bed position. Temperature values were recorded under steady state conditions.

The Gas Chromatograph (GC) G1530A from Agilent Technologies is equipped with a thermal conductivity detector (TCD), a flame ionization detector (FID), an automatic loop filling manager system from Teuner Analysentechnik GmbH (LFM 205) and two capillary columns RT-Msieve 5A and RT-U-BOND from Restek Corporation.

For the kinetic studies, mixtures of a commercially available CuO/ZnO/ $\alpha$ -Al<sub>2</sub>O<sub>3</sub> (CZA) catalyst provided by an industrial partner,  $\gamma$ -Al<sub>2</sub>O<sub>3</sub> (ALOX, Alfa Aesar) and silicon carbide (SiC, Hausen Mineraliengroßhandel GmbH) were used.

The reactant gases carbon monoxide (CO, 99,97 %), argon (Ar, 99,9999 %), nitrogen (N<sub>2</sub>, 99,9999 %), Hydrogen (H<sub>2</sub>, 9,9999 %) and mixture carbon dioxide and nitrogen (CO<sub>2</sub>/N<sub>2</sub>, 50:50  $\pm$  1.0 vol. %) were provided by Air Liquid Germany GmbH.

### ***Section 3.1 Reaction kinetic measurements***

The measured kinetic data used for the parameter estimation of the lumped kinetic model are provided in Table 1.

The reader is advised:

- The feed gas consisted of Hydrogen, Carbon Monoxide, Carbon Dioxide and inert gas (Argon and Nitrogen). Only the concentration of the reactive components is reported here.
- Each operating point was measured under steady state conditions for approx. 90 Minutes. Possible deviations and fluctuations of the reported temperature and inlet volume flow are here neglected.

Table 1: Measured kinetic data

| Ex p. ID | Temp. | Inlet Vol. Flow | Mass CZA-Cat. | Mass ALO X-Cat. | Mass SiC | Cat. Bed Length | H <sub>2</sub> in Feed | CO in Feed | CO <sub>2</sub> in Feed | H <sub>2</sub> in Product | CO in Product | CO <sub>2</sub> in Product | DME in Product |
|----------|-------|-----------------|---------------|-----------------|----------|-----------------|------------------------|------------|-------------------------|---------------------------|---------------|----------------------------|----------------|
| -        | °C    | SLP M           | g             | g               | g        | m               | Vol. %                 | Vol. %     | Vol. %                  | Vol. %                    | Vol. %        | Vol. %                     | Vol. %         |
| 1        | 220   | 0.7             | 1.0002        | 1.0017          | 5.0000   | 0.0545          | 47.9521                | 16.0618    | 2.8835                  | 46.7574                   | 15.2641       | 2.8206                     | 0.1190         |
| 2        | 220   | 0.6             | 1.0002        | 1.0017          | 5.0000   | 0.0545          | 47.9964                | 16.1122    | 2.8830                  | 46.7599                   | 15.2771       | 2.8282                     | 0.1522         |
| 3        | 220   | 0.5             | 1.0002        | 1.0017          | 5.0000   | 0.0545          | 47.9760                | 16.0905    | 2.8811                  | 46.6335                   | 15.0919       | 2.8310                     | 0.1876         |
| 4        | 220   | 0.4             | 1.0002        | 1.0017          | 5.0000   | 0.0545          | 47.6962                | 15.7591    | 2.8476                  | 46.6793                   | 14.9872       | 2.9265                     | 0.2478         |
| 5        | 220   | 0.3             | 1.0002        | 1.0017          | 5.0000   | 0.0545          | 48.1176                | 15.9125    | 2.8534                  | 46.6024                   | 14.8201       | 3.0040                     | 0.3366         |
| 6        | 220   | 0.2             | 1.0002        | 1.0017          | 5.0000   | 0.0545          | 48.4200                | 16.0724    | 2.8148                  | 46.0863                   | 13.8527       | 3.3271                     | 0.6556         |
| 7        | 230   | 0.7             | 1.0002        | 1.0017          | 5.0000   | 0.0545          | 47.9521                | 16.0618    | 2.8835                  | 46.4037                   | 14.7769       | 2.9888                     | 0.3038         |
| 8        | 230   | 0.6             | 1.0002        | 1.0017          | 5.0000   | 0.0545          | 47.9964                | 16.1122    | 2.8830                  | 46.4811                   | 14.7700       | 2.9967                     | 0.3250         |
| 9        | 230   | 0.5             | 1.0002        | 1.0017          | 5.0000   | 0.0545          | 47.9760                | 16.0905    | 2.8811                  | 46.2513                   | 14.5797       | 3.0496                     | 0.3949         |
| 10       | 230   | 0.4             | 1.0002        | 1.0017          | 5.0000   | 0.0545          | 47.6962                | 15.7591    | 2.8476                  | 46.2415                   | 14.3136       | 3.2145                     | 0.5201         |
| 11       | 230   | 0.3             | 1.0002        | 1.0017          | 5.0000   | 0.0545          | 48.1176                | 15.9125    | 2.8534                  | 45.9355                   | 13.9055       | 3.3430                     | 0.7081         |

|           |     |     |            |            |            |            |             |             |            |             |             |        |        |
|-----------|-----|-----|------------|------------|------------|------------|-------------|-------------|------------|-------------|-------------|--------|--------|
|           |     |     | 2          | 7          | 0          | 5          | 76          | 25          | 4          | 7           | 8           |        |        |
| <b>12</b> | 230 | 0.2 | 1.000<br>2 | 1.001<br>7 | 5.000<br>0 | 0.054<br>5 | 48.42<br>00 | 16.07<br>24 | 2.814<br>8 | 45.055<br>8 | 12.255<br>2 | 3.9595 | 1.3078 |
| <b>13</b> | 240 | 0.7 | 1.000<br>2 | 1.001<br>7 | 5.000<br>0 | 0.054<br>5 | 47.95<br>21 | 16.06<br>18 | 2.883<br>5 | 45.837<br>3 | 13.990<br>8 | 3.2840 | 0.6447 |
| <b>14</b> | 240 | 0.6 | 1.000<br>2 | 1.001<br>7 | 5.000<br>0 | 0.054<br>5 | 47.99<br>64 | 16.11<br>22 | 2.883<br>0 | 45.857<br>1 | 13.984<br>4 | 3.2881 | 0.6505 |
| <b>15</b> | 240 | 0.5 | 1.000<br>2 | 1.001<br>7 | 5.000<br>0 | 0.054<br>5 | 47.97<br>60 | 16.09<br>05 | 2.881<br>1 | 45.449<br>0 | 13.649<br>0 | 3.3512 | 0.7593 |
| <b>16</b> | 240 | 0.4 | 1.000<br>2 | 1.001<br>7 | 5.000<br>0 | 0.054<br>5 | 47.69<br>62 | 15.75<br>91 | 2.847<br>6 | 45.628<br>3 | 13.241<br>2 | 3.6648 | 1.0165 |
| <b>17</b> | 240 | 0.3 | 1.000<br>2 | 1.001<br>7 | 5.000<br>0 | 0.054<br>5 | 48.11<br>76 | 15.91<br>25 | 2.853<br>4 | 45.107<br>8 | 12.563<br>2 | 3.8949 | 1.2982 |
| <b>18</b> | 240 | 0.2 | 1.000<br>2 | 1.001<br>7 | 5.000<br>0 | 0.054<br>5 | 48.42<br>00 | 16.07<br>24 | 2.814<br>8 | 43.990<br>3 | 10.161<br>2 | 4.8538 | 2.2916 |
| <b>19</b> | 250 | 0.7 | 1.000<br>2 | 1.001<br>7 | 5.000<br>0 | 0.054<br>5 | 47.95<br>21 | 16.06<br>18 | 2.883<br>5 | 45.187<br>0 | 12.912<br>6 | 3.7566 | 1.1476 |
| <b>20</b> | 250 | 0.6 | 1.000<br>2 | 1.001<br>7 | 5.000<br>0 | 0.054<br>5 | 47.99<br>64 | 16.11<br>22 | 2.883<br>0 | 44.848<br>5 | 12.697<br>2 | 3.7438 | 1.1509 |
| <b>21</b> | 250 | 0.5 | 1.000<br>2 | 1.001<br>7 | 5.000<br>0 | 0.054<br>5 | 47.97<br>60 | 16.09<br>05 | 2.881<br>1 | 44.656<br>7 | 12.367<br>3 | 3.8704 | 1.3352 |
| <b>22</b> | 250 | 0.4 | 1.000<br>2 | 1.001<br>7 | 5.000<br>0 | 0.054<br>5 | 47.69<br>62 | 15.75<br>91 | 2.847<br>6 | 44.708<br>9 | 11.723<br>2 | 4.2624 | 1.7025 |
| <b>23</b> | 250 | 0.3 | 1.000<br>2 | 1.001<br>7 | 5.000<br>0 | 0.054<br>5 | 48.11<br>76 | 15.91<br>25 | 2.853<br>4 | 44.082<br>4 | 10.750<br>4 | 4.6558 | 2.1266 |
| <b>24</b> | 250 | 0.2 | 1.000<br>2 | 1.001<br>7 | 5.000<br>0 | 0.054<br>5 | 48.42<br>00 | 16.07<br>24 | 2.814<br>8 | 42.839<br>3 | 7.8665      | 5.8356 | 3.3782 |
| <b>25</b> | 260 | 0.7 | 1.000<br>2 | 1.001<br>7 | 5.000<br>0 | 0.054<br>5 | 47.95<br>21 | 16.06<br>18 | 2.883<br>5 | 44.578<br>7 | 11.665<br>9 | 4.2707 | 1.7367 |

|           |     |     |            |            |             |            |             |             |            |             |             |        |        |
|-----------|-----|-----|------------|------------|-------------|------------|-------------|-------------|------------|-------------|-------------|--------|--------|
| <b>26</b> | 260 | 0.6 | 1.000<br>2 | 1.001<br>7 | 5.000<br>0  | 0.054<br>5 | 47.99<br>64 | 16.11<br>22 | 2.883<br>0 | 44.188<br>8 | 11.421<br>1 | 4.3248 | 1.7902 |
| <b>27</b> | 260 | 0.5 | 1.000<br>2 | 1.001<br>7 | 5.000<br>0  | 0.054<br>5 | 47.97<br>60 | 16.09<br>05 | 2.881<br>1 | 43.890<br>9 | 10.884<br>8 | 4.5250 | 2.0394 |
| <b>28</b> | 260 | 0.4 | 1.000<br>2 | 1.001<br>7 | 5.000<br>0  | 0.054<br>5 | 47.69<br>62 | 15.75<br>91 | 2.847<br>6 | 43.871<br>4 | 10.044<br>2 | 4.9880 | 2.4909 |
| <b>29</b> | 260 | 0.3 | 1.000<br>2 | 1.001<br>7 | 5.000<br>0  | 0.054<br>5 | 48.11<br>76 | 15.91<br>25 | 2.853<br>4 | 42.915<br>6 | 8.7959      | 5.4843 | 3.0326 |
| <b>30</b> | 260 | 0.2 | 1.000<br>2 | 1.001<br>7 | 5.000<br>0  | 0.054<br>5 | 48.42<br>00 | 16.07<br>24 | 2.814<br>8 | 41.749<br>9 | 5.9459      | 6.6015 | 4.2672 |
| <b>31</b> | 220 | 0.7 | 1.000<br>2 | 1.001<br>7 | 10.00<br>00 | 0.080<br>0 | 30.23<br>71 | 8.333<br>1  | 2.902<br>4 | 29.422<br>1 | 8.0958      | 2.7760 | 0.0674 |
| <b>32</b> | 220 | 0.6 | 1.000<br>2 | 1.001<br>7 | 10.00<br>00 | 0.080<br>0 | 30.15<br>34 | 8.177<br>9  | 2.809<br>6 | 29.162<br>4 | 7.8348      | 2.8048 | 0.1366 |
| <b>33</b> | 220 | 0.5 | 1.000<br>2 | 1.001<br>7 | 10.00<br>00 | 0.080<br>0 | 30.28<br>31 | 8.287<br>6  | 2.854<br>7 | 29.252<br>8 | 7.7607      | 2.8760 | 0.1677 |
| <b>34</b> | 220 | 0.4 | 1.000<br>2 | 1.001<br>7 | 10.00<br>00 | 0.080<br>0 | 30.28<br>31 | 8.287<br>6  | 2.854<br>7 | 29.128<br>1 | 7.6512      | 2.9297 | 0.2187 |
| <b>35</b> | 220 | 0.3 | 1.000<br>2 | 1.001<br>7 | 10.00<br>00 | 0.080<br>0 | 30.11<br>09 | 8.353<br>2  | 2.945<br>1 | 28.811<br>7 | 7.3482      | 3.0059 | 0.3170 |
| <b>36</b> | 220 | 0.2 | 1.000<br>2 | 1.001<br>7 | 10.00<br>00 | 0.080<br>0 | 30.25<br>12 | 8.373<br>7  | 2.880<br>4 | 28.574<br>4 | 6.7593      | 3.2333 | 0.5272 |
| <b>37</b> | 230 | 0.7 | 1.000<br>2 | 1.001<br>7 | 10.00<br>00 | 0.080<br>0 | 30.23<br>71 | 8.333<br>1  | 2.902<br>4 | 29.205<br>6 | 7.8803      | 2.8456 | 0.1341 |
| <b>38</b> | 230 | 0.6 | 1.000<br>2 | 1.001<br>7 | 10.00<br>00 | 0.080<br>0 | 30.15<br>34 | 8.177<br>9  | 2.809<br>6 | 28.866<br>0 | 7.5381      | 2.9028 | 0.2479 |
| <b>39</b> | 230 | 0.5 | 1.000<br>2 | 1.001<br>7 | 10.00<br>00 | 0.080<br>0 | 30.28<br>31 | 8.287<br>6  | 2.854<br>7 | 28.957<br>4 | 7.4175      | 2.9850 | 0.3083 |
| <b>40</b> | 230 | 0.4 | 1.000      | 1.001      | 10.00       | 0.080      | 30.28       | 8.287       | 2.854      | 28.750      | 7.2033      | 3.0519 | 0.3946 |

|           |     |     |            |            |             |            |             |            |            |             |        |        |        |
|-----------|-----|-----|------------|------------|-------------|------------|-------------|------------|------------|-------------|--------|--------|--------|
|           |     |     | 2          | 7          | 00          | 0          | 31          | 6          | 7          | 3           |        |        |        |
| <b>41</b> | 230 | 0.3 | 1.000<br>2 | 1.001<br>7 | 10.00<br>00 | 0.080<br>0 | 30.11<br>09 | 8.353<br>2 | 2.945<br>1 | 28.432<br>6 | 6.7994 | 3.2084 | 0.5456 |
| <b>42</b> | 230 | 0.2 | 1.000<br>2 | 1.001<br>7 | 10.00<br>00 | 0.080<br>0 | 30.25<br>12 | 8.373<br>7 | 2.880<br>4 | 28.016<br>0 | 5.9863 | 3.5308 | 0.8679 |
| <b>43</b> | 240 | 0.7 | 1.000<br>2 | 1.001<br>7 | 10.00<br>00 | 0.080<br>0 | 30.23<br>71 | 8.333<br>1 | 2.902<br>4 | 28.987<br>3 | 7.6063 | 2.9096 | 0.2493 |
| <b>44</b> | 240 | 0.6 | 1.000<br>2 | 1.001<br>7 | 10.00<br>00 | 0.080<br>0 | 30.15<br>34 | 8.177<br>9 | 2.809<br>6 | 28.623<br>9 | 7.1417 | 3.0868 | 0.4361 |
| <b>45</b> | 240 | 0.5 | 1.000<br>2 | 1.001<br>7 | 10.00<br>00 | 0.080<br>0 | 30.28<br>31 | 8.287<br>6 | 2.854<br>7 | 28.571<br>2 | 6.9478 | 3.2142 | 0.5199 |
| <b>46</b> | 240 | 0.4 | 1.000<br>2 | 1.001<br>7 | 10.00<br>00 | 0.080<br>0 | 30.28<br>31 | 8.287<br>6 | 2.854<br>7 | 28.270<br>3 | 6.6173 | 3.2730 | 0.6452 |
| <b>47</b> | 240 | 0.3 | 1.000<br>2 | 1.001<br>7 | 10.00<br>00 | 0.080<br>0 | 30.11<br>09 | 8.353<br>2 | 2.945<br>1 | 27.836<br>2 | 6.0568 | 3.5481 | 0.8580 |
| <b>48</b> | 240 | 0.2 | 1.000<br>2 | 1.001<br>7 | 10.00<br>00 | 0.080<br>0 | 30.25<br>12 | 8.373<br>7 | 2.880<br>4 | 27.234<br>6 | 5.0335 | 3.7976 | 1.2748 |
| <b>49</b> | 250 | 0.7 | 1.000<br>2 | 1.001<br>7 | 10.00<br>00 | 0.080<br>0 | 30.23<br>71 | 8.333<br>1 | 2.902<br>4 | 28.634<br>0 | 7.2220 | 3.0638 | 0.4168 |
| <b>50</b> | 250 | 0.6 | 1.000<br>2 | 1.001<br>7 | 10.00<br>00 | 0.080<br>0 | 30.15<br>34 | 8.177<br>9 | 2.809<br>6 | 28.302<br>3 | 6.5847 | 3.3296 | 0.6758 |
| <b>51</b> | 250 | 0.5 | 1.000<br>2 | 1.001<br>7 | 10.00<br>00 | 0.080<br>0 | 30.28<br>31 | 8.287<br>6 | 2.854<br>7 | 28.120<br>6 | 6.3270 | 3.4028 | 0.7691 |
| <b>52</b> | 250 | 0.4 | 1.000<br>2 | 1.001<br>7 | 10.00<br>00 | 0.080<br>0 | 30.28<br>31 | 8.287<br>6 | 2.854<br>7 | 27.715<br>5 | 5.9167 | 3.5578 | 0.9363 |
| <b>53</b> | 250 | 0.3 | 1.000<br>2 | 1.001<br>7 | 10.00<br>00 | 0.080<br>0 | 30.11<br>09 | 8.353<br>2 | 2.945<br>1 | 27.281<br>4 | 5.2884 | 3.7935 | 1.1887 |
| <b>54</b> | 250 | 0.2 | 1.000<br>2 | 1.001<br>7 | 10.00<br>00 | 0.080<br>0 | 30.25<br>12 | 8.373<br>7 | 2.880<br>4 | 26.623<br>8 | 4.1922 | 4.1511 | 1.6449 |

|           |     |     |            |            |             |            |             |            |            |             |        |        |        |
|-----------|-----|-----|------------|------------|-------------|------------|-------------|------------|------------|-------------|--------|--------|--------|
| <b>55</b> | 260 | 0.7 | 1.000<br>2 | 1.001<br>7 | 10.00<br>00 | 0.080<br>0 | 30.23<br>71 | 8.333<br>1 | 2.902<br>4 | 28.274<br>2 | 6.7380 | 3.2400 | 0.6188 |
| <b>56</b> | 260 | 0.6 | 1.000<br>2 | 1.001<br>7 | 10.00<br>00 | 0.080<br>0 | 30.15<br>34 | 8.177<br>9 | 2.809<br>6 | 27.837<br>7 | 6.0005 | 3.4991 | 0.9141 |
| <b>57</b> | 260 | 0.5 | 1.000<br>2 | 1.001<br>7 | 10.00<br>00 | 0.080<br>0 | 30.28<br>31 | 8.287<br>6 | 2.854<br>7 | 27.614<br>2 | 5.7184 | 3.5971 | 1.0343 |
| <b>58</b> | 260 | 0.4 | 1.000<br>2 | 1.001<br>7 | 10.00<br>00 | 0.080<br>0 | 30.28<br>31 | 8.287<br>6 | 2.854<br>7 | 27.246<br>9 | 5.2907 | 3.7708 | 1.2109 |
| <b>59</b> | 260 | 0.3 | 1.000<br>2 | 1.001<br>7 | 10.00<br>00 | 0.080<br>0 | 30.11<br>09 | 8.353<br>2 | 2.945<br>1 | 26.669<br>7 | 4.5852 | 3.9625 | 1.4868 |
| <b>60</b> | 260 | 0.2 | 1.000<br>2 | 1.001<br>7 | 10.00<br>00 | 0.080<br>0 | 30.25<br>12 | 8.373<br>7 | 2.880<br>4 | 26.018<br>0 | 3.6080 | 4.3567 | 1.9090 |
| <b>61</b> | 220 | 0.7 | 1.000<br>2 | 1.001<br>7 | 10.00<br>00 | 0.080<br>0 | 20.37<br>39 | 4.118<br>0 | 2.859<br>5 | 19.808<br>7 | 3.9426 | 2.7458 | 0.0657 |
| <b>62</b> | 220 | 0.6 | 1.000<br>2 | 1.001<br>7 | 10.00<br>00 | 0.080<br>0 | 20.37<br>39 | 4.118<br>0 | 2.859<br>5 | 19.671<br>0 | 3.9061 | 2.7453 | 0.0744 |
| <b>63</b> | 220 | 0.5 | 1.000<br>2 | 1.001<br>7 | 10.00<br>00 | 0.080<br>0 | 20.17<br>65 | 4.045<br>8 | 2.883<br>0 | 19.519<br>7 | 3.8318 | 2.7799 | 0.0923 |
| <b>64</b> | 220 | 0.4 | 1.000<br>2 | 1.001<br>7 | 10.00<br>00 | 0.080<br>0 | 20.17<br>65 | 4.045<br>8 | 2.883<br>0 | 19.442<br>6 | 3.7183 | 2.8087 | 0.1229 |
| <b>65</b> | 220 | 0.3 | 1.000<br>2 | 1.001<br>7 | 10.00<br>00 | 0.080<br>0 | 20.22<br>29 | 4.008<br>5 | 2.849<br>6 | 19.477<br>8 | 3.5695 | 2.8672 | 0.1724 |
| <b>66</b> | 220 | 0.2 | 1.000<br>2 | 1.001<br>7 | 10.00<br>00 | 0.080<br>0 | 20.33<br>01 | 4.050<br>7 | 2.862<br>6 | 19.497<br>4 | 3.2875 | 2.9309 | 0.2794 |
| <b>67</b> | 230 | 0.7 | 1.000<br>2 | 1.001<br>7 | 10.00<br>00 | 0.080<br>0 | 20.37<br>39 | 4.118<br>0 | 2.859<br>5 | 19.637<br>6 | 3.8179 | 2.7495 | 0.1114 |
| <b>68</b> | 230 | 0.6 | 1.000<br>2 | 1.001<br>7 | 10.00<br>00 | 0.080<br>0 | 20.37<br>39 | 4.118<br>0 | 2.859<br>5 | 19.489<br>3 | 3.7667 | 2.7689 | 0.1285 |
| <b>69</b> | 230 | 0.5 | 1.000      | 1.001      | 10.00       | 0.080      | 20.17       | 4.045      | 2.883      | 19.322      | 3.6605 | 2.8114 | 0.1559 |



|           |     |     |            |            |             |            |             |            |            |             |        |        |        |
|-----------|-----|-----|------------|------------|-------------|------------|-------------|------------|------------|-------------|--------|--------|--------|
|           |     |     | 2          | 7          | 00          | 0          | 65          | 8          | 0          | 5           |        |        |        |
| <b>70</b> | 230 | 0.4 | 1.000<br>2 | 1.001<br>7 | 10.00<br>00 | 0.080<br>0 | 20.17<br>65 | 4.045<br>8 | 2.883<br>0 | 19.240<br>7 | 3.5196 | 2.8461 | 0.2020 |
| <b>71</b> | 230 | 0.3 | 1.000<br>2 | 1.001<br>7 | 10.00<br>00 | 0.080<br>0 | 20.22<br>29 | 4.008<br>5 | 2.849<br>6 | 19.321<br>3 | 3.3273 | 2.9407 | 0.2775 |
| <b>72</b> | 230 | 0.2 | 1.000<br>2 | 1.001<br>7 | 10.00<br>00 | 0.080<br>0 | 20.33<br>01 | 4.050<br>7 | 2.862<br>6 | 19.174<br>0 | 2.9323 | 3.0258 | 0.4218 |
| <b>73</b> | 240 | 0.7 | 1.000<br>2 | 1.001<br>7 | 10.00<br>00 | 0.080<br>0 | 20.37<br>39 | 4.118<br>0 | 2.859<br>5 | 19.499<br>7 | 3.6736 | 2.8073 | 0.1765 |
| <b>74</b> | 240 | 0.6 | 1.000<br>2 | 1.001<br>7 | 10.00<br>00 | 0.080<br>0 | 20.37<br>39 | 4.118<br>0 | 2.859<br>5 | 19.279<br>7 | 3.5911 | 2.8033 | 0.2030 |
| <b>75</b> | 240 | 0.5 | 1.000<br>2 | 1.001<br>7 | 10.00<br>00 | 0.080<br>0 | 20.17<br>65 | 4.045<br>8 | 2.883<br>0 | 19.183<br>2 | 3.4863 | 2.8768 | 0.2415 |
| <b>76</b> | 240 | 0.4 | 1.000<br>2 | 1.001<br>7 | 10.00<br>00 | 0.080<br>0 | 20.17<br>65 | 4.045<br>8 | 2.883<br>0 | 19.036<br>3 | 3.3077 | 2.9388 | 0.2992 |
| <b>77</b> | 240 | 0.3 | 1.000<br>2 | 1.001<br>7 | 10.00<br>00 | 0.080<br>0 | 20.22<br>29 | 4.008<br>5 | 2.849<br>6 | 19.110<br>6 | 3.0527 | 3.0197 | 0.3999 |
| <b>78</b> | 240 | 0.2 | 1.000<br>2 | 1.001<br>7 | 10.00<br>00 | 0.080<br>0 | 20.33<br>01 | 4.050<br>7 | 2.862<br>6 | 18.783<br>4 | 2.5695 | 3.1438 | 0.5700 |
| <b>79</b> | 250 | 0.7 | 1.000<br>2 | 1.001<br>7 | 10.00<br>00 | 0.080<br>0 | 20.37<br>39 | 4.118<br>0 | 2.859<br>5 | 19.320<br>0 | 3.5212 | 2.8476 | 0.2505 |
| <b>80</b> | 250 | 0.6 | 1.000<br>2 | 1.001<br>7 | 10.00<br>00 | 0.080<br>0 | 20.37<br>39 | 4.118<br>0 | 2.859<br>5 | 19.109<br>0 | 3.4051 | 2.8903 | 0.2851 |
| <b>81</b> | 250 | 0.5 | 1.000<br>2 | 1.001<br>7 | 10.00<br>00 | 0.080<br>0 | 20.17<br>65 | 4.045<br>8 | 2.883<br>0 | 19.005<br>5 | 3.2768 | 2.9561 | 0.3314 |
| <b>82</b> | 250 | 0.4 | 1.000<br>2 | 1.001<br>7 | 10.00<br>00 | 0.080<br>0 | 20.17<br>65 | 4.045<br>8 | 2.883<br>0 | 18.781<br>7 | 3.0787 | 2.9893 | 0.4006 |
| <b>83</b> | 250 | 0.3 | 1.000<br>2 | 1.001<br>7 | 10.00<br>00 | 0.080<br>0 | 20.22<br>29 | 4.008<br>5 | 2.849<br>6 | 18.860<br>3 | 2.7960 | 3.0871 | 0.5085 |

|           |     |     |            |            |             |            |             |             |            |             |             |        |        |
|-----------|-----|-----|------------|------------|-------------|------------|-------------|-------------|------------|-------------|-------------|--------|--------|
| <b>84</b> | 250 | 0.2 | 1.000<br>2 | 1.001<br>7 | 10.00<br>00 | 0.080<br>0 | 20.33<br>01 | 4.050<br>7  | 2.862<br>6 | 18.598<br>3 | 2.3130      | 3.1967 | 0.6835 |
| <b>85</b> | 260 | 0.7 | 1.000<br>2 | 1.001<br>7 | 10.00<br>00 | 0.080<br>0 | 20.37<br>39 | 4.118<br>0  | 2.859<br>5 | 19.149<br>0 | 3.3891      | 2.8903 | 0.3131 |
| <b>86</b> | 260 | 0.6 | 1.000<br>2 | 1.001<br>7 | 10.00<br>00 | 0.080<br>0 | 20.37<br>39 | 4.118<br>0  | 2.859<br>5 | 19.002<br>9 | 3.2503      | 2.9465 | 0.3527 |
| <b>87</b> | 260 | 0.5 | 1.000<br>2 | 1.001<br>7 | 10.00<br>00 | 0.080<br>0 | 20.17<br>65 | 4.045<br>8  | 2.883<br>0 | 18.816<br>7 | 3.1226      | 2.9831 | 0.4013 |
| <b>88</b> | 260 | 0.4 | 1.000<br>2 | 1.001<br>7 | 10.00<br>00 | 0.080<br>0 | 20.17<br>65 | 4.045<br>8  | 2.883<br>0 | 18.576<br>2 | 2.9056      | 3.0461 | 0.4704 |
| <b>89</b> | 260 | 0.3 | 1.000<br>2 | 1.001<br>7 | 10.00<br>00 | 0.080<br>0 | 20.22<br>29 | 4.008<br>5  | 2.849<br>6 | 18.650<br>2 | 2.6586      | 3.1209 | 0.5726 |
| <b>90</b> | 260 | 0.2 | 1.000<br>2 | 1.001<br>7 | 10.00<br>00 | 0.080<br>0 | 20.33<br>01 | 4.050<br>7  | 2.862<br>6 | 18.440<br>7 | 2.2483      | 3.2382 | 0.7175 |
| <b>91</b> | 220 | 0.7 | 1.000<br>2 | 1.001<br>7 | 10.00<br>00 | 0.080<br>0 | 41.28<br>34 | 15.81<br>43 | 0.909<br>3 | 40.898<br>2 | 15.465<br>2 | 0.9273 | 0.1296 |
| <b>92</b> | 220 | 0.6 | 1.000<br>2 | 1.001<br>7 | 10.00<br>00 | 0.080<br>0 | 41.28<br>34 | 15.81<br>43 | 0.909<br>3 | 41.083<br>0 | 15.536<br>4 | 0.9760 | 0.1850 |
| <b>93</b> | 220 | 0.5 | 1.000<br>2 | 1.001<br>7 | 10.00<br>00 | 0.080<br>0 | 41.67<br>09 | 15.98<br>54 | 0.911<br>3 | 41.039<br>9 | 15.470<br>7 | 1.0148 | 0.2462 |
| <b>94</b> | 220 | 0.4 | 1.000<br>2 | 1.001<br>7 | 10.00<br>00 | 0.080<br>0 | 41.67<br>09 | 15.98<br>54 | 0.911<br>3 | 40.865<br>9 | 15.262<br>5 | 1.0735 | 0.3395 |
| <b>95</b> | 220 | 0.3 | 1.000<br>2 | 1.001<br>7 | 10.00<br>00 | 0.080<br>0 | 41.84<br>97 | 16.06<br>62 | 0.894<br>7 | 40.619<br>9 | 14.943<br>1 | 1.1611 | 0.4713 |
| <b>96</b> | 220 | 0.2 | 1.000<br>2 | 1.001<br>7 | 10.00<br>00 | 0.080<br>0 | 42.32<br>76 | 16.13<br>62 | 0.819<br>2 | 39.733<br>9 | 14.157<br>8 | 1.4173 | 0.8071 |
| <b>97</b> | 230 | 0.7 | 1.000<br>2 | 1.001<br>7 | 10.00<br>00 | 0.080<br>0 | 41.28<br>34 | 15.81<br>43 | 0.909<br>3 | 40.771<br>4 | 15.242<br>9 | 1.0121 | 0.2388 |
| <b>98</b> | 230 | 0.6 | 1.000      | 1.001      | 10.00       | 0.080      | 41.28       | 15.81       | 0.909      | 40.911      | 15.231      | 1.1026 | 0.3269 |

|            |     |     |            |            |             |            |             |             |            |             |             |        |        |
|------------|-----|-----|------------|------------|-------------|------------|-------------|-------------|------------|-------------|-------------|--------|--------|
|            |     |     | 2          | 7          | 00          | 0          | 34          | 43          | 3          | 1           | 5           |        |        |
| <b>99</b>  | 230 | 0.5 | 1.000<br>2 | 1.001<br>7 | 10.00<br>00 | 0.080<br>0 | 41.67<br>09 | 15.98<br>54 | 0.911<br>3 | 40.755<br>2 | 15.027<br>0 | 1.1637 | 0.4242 |
| <b>100</b> | 230 | 0.4 | 1.000<br>2 | 1.001<br>7 | 10.00<br>00 | 0.080<br>0 | 41.67<br>09 | 15.98<br>54 | 0.911<br>3 | 40.429<br>4 | 14.714<br>8 | 1.2708 | 0.5729 |
| <b>101</b> | 230 | 0.3 | 1.000<br>2 | 1.001<br>7 | 10.00<br>00 | 0.080<br>0 | 41.84<br>97 | 16.06<br>62 | 0.894<br>7 | 40.010<br>3 | 14.188<br>1 | 1.4312 | 0.7828 |
| <b>102</b> | 230 | 0.2 | 1.000<br>2 | 1.001<br>7 | 10.00<br>00 | 0.080<br>0 | 42.32<br>76 | 16.13<br>62 | 0.819<br>2 | 38.944<br>2 | 12.969<br>8 | 1.8464 | 1.3010 |
| <b>103</b> | 240 | 0.7 | 1.000<br>2 | 1.001<br>7 | 10.00<br>00 | 0.080<br>0 | 41.28<br>34 | 15.81<br>43 | 0.909<br>3 | 40.425<br>9 | 14.807<br>2 | 1.1584 | 0.4117 |
| <b>104</b> | 240 | 0.6 | 1.000<br>2 | 1.001<br>7 | 10.00<br>00 | 0.080<br>0 | 41.28<br>34 | 15.81<br>43 | 0.909<br>3 | 40.610<br>5 | 14.781<br>5 | 1.2878 | 0.5467 |
| <b>105</b> | 240 | 0.5 | 1.000<br>2 | 1.001<br>7 | 10.00<br>00 | 0.080<br>0 | 41.67<br>09 | 15.98<br>54 | 0.911<br>3 | 40.208<br>6 | 14.350<br>8 | 1.4003 | 0.6977 |
| <b>106</b> | 240 | 0.4 | 1.000<br>2 | 1.001<br>7 | 10.00<br>00 | 0.080<br>0 | 41.67<br>09 | 15.98<br>54 | 0.911<br>3 | 39.921<br>6 | 13.934<br>2 | 1.5756 | 0.9266 |
| <b>107</b> | 240 | 0.3 | 1.000<br>2 | 1.001<br>7 | 10.00<br>00 | 0.080<br>0 | 41.84<br>97 | 16.06<br>62 | 0.894<br>7 | 39.133<br>9 | 13.048<br>3 | 1.8323 | 1.2556 |
| <b>108</b> | 240 | 0.2 | 1.000<br>2 | 1.001<br>7 | 10.00<br>00 | 0.080<br>0 | 42.32<br>76 | 16.13<br>62 | 0.819<br>2 | 37.873<br>6 | 11.374<br>2 | 2.4964 | 2.0382 |
| <b>109</b> | 250 | 0.7 | 1.000<br>2 | 1.001<br>7 | 10.00<br>00 | 0.080<br>0 | 41.28<br>34 | 15.81<br>43 | 0.909<br>3 | 40.006<br>1 | 14.199<br>0 | 1.3890 | 0.6812 |
| <b>110</b> | 250 | 0.6 | 1.000<br>2 | 1.001<br>7 | 10.00<br>00 | 0.080<br>0 | 41.28<br>34 | 15.81<br>43 | 0.909<br>3 | 40.055<br>8 | 14.011<br>4 | 1.5600 | 0.8783 |
| <b>111</b> | 250 | 0.5 | 1.000<br>2 | 1.001<br>7 | 10.00<br>00 | 0.080<br>0 | 41.67<br>09 | 15.98<br>54 | 0.911<br>3 | 39.641<br>1 | 13.467<br>7 | 1.7418 | 1.1102 |
| <b>112</b> | 250 | 0.4 | 1.000<br>2 | 1.001<br>7 | 10.00<br>00 | 0.080<br>0 | 41.67<br>09 | 15.98<br>54 | 0.911<br>3 | 39.006<br>9 | 12.721<br>7 | 2.0205 | 1.4307 |

|            |     |     |            |            |             |            |             |             |            |             |             |        |        |
|------------|-----|-----|------------|------------|-------------|------------|-------------|-------------|------------|-------------|-------------|--------|--------|
| <b>113</b> | 250 | 0.3 | 1.000<br>2 | 1.001<br>7 | 10.00<br>00 | 0.080<br>0 | 41.84<br>97 | 16.06<br>62 | 0.894<br>7 | 38.086<br>7 | 11.517<br>1 | 2.4156 | 1.9394 |
| <b>114</b> | 250 | 0.2 | 1.000<br>2 | 1.001<br>7 | 10.00<br>00 | 0.080<br>0 | 42.32<br>76 | 16.13<br>62 | 0.819<br>2 | 36.338<br>2 | 9.1713      | 3.2742 | 2.9509 |
| <b>115</b> | 260 | 0.7 | 1.000<br>2 | 1.001<br>7 | 10.00<br>00 | 0.080<br>0 | 41.28<br>34 | 15.81<br>43 | 0.909<br>3 | 39.421<br>3 | 13.333<br>8 | 1.7268 | 1.0742 |
| <b>116</b> | 260 | 0.6 | 1.000<br>2 | 1.001<br>7 | 10.00<br>00 | 0.080<br>0 | 41.28<br>34 | 15.81<br>43 | 0.909<br>3 | 39.291<br>3 | 12.929<br>5 | 1.9652 | 1.3370 |
| <b>117</b> | 260 | 0.5 | 1.000<br>2 | 1.001<br>7 | 10.00<br>00 | 0.080<br>0 | 41.67<br>09 | 15.98<br>54 | 0.911<br>3 | 38.630<br>2 | 12.173<br>4 | 2.2193 | 1.6576 |
| <b>118</b> | 260 | 0.4 | 1.000<br>2 | 1.001<br>7 | 10.00<br>00 | 0.080<br>0 | 41.67<br>09 | 15.98<br>54 | 0.911<br>3 | 37.968<br>8 | 11.206<br>4 | 2.5730 | 2.0891 |
| <b>119</b> | 260 | 0.3 | 1.000<br>2 | 1.001<br>7 | 10.00<br>00 | 0.080<br>0 | 41.84<br>97 | 16.06<br>62 | 0.894<br>7 | 36.699<br>3 | 9.6157      | 3.1148 | 2.7614 |
| <b>120</b> | 260 | 0.2 | 1.000<br>2 | 1.001<br>7 | 10.00<br>00 | 0.080<br>0 | 42.32<br>76 | 16.13<br>62 | 0.819<br>2 | 35.047<br>0 | 7.0272      | 4.1437 | 3.9770 |
| <b>121</b> | 220 | 0.7 | 1.000<br>2 | 1.001<br>7 | 10.00<br>00 | 0.080<br>0 | 23.95<br>62 | 8.481<br>4  | 0.885<br>9 | 23.217<br>0 | 8.0966      | 0.9005 | 0.1232 |
| <b>122</b> | 220 | 0.6 | 1.000<br>2 | 1.001<br>7 | 10.00<br>00 | 0.080<br>0 | 23.89<br>21 | 8.474<br>5  | 0.878<br>5 | 23.314<br>4 | 8.1380      | 0.9153 | 0.1322 |
| <b>123</b> | 220 | 0.5 | 1.000<br>2 | 1.001<br>7 | 10.00<br>00 | 0.080<br>0 | 23.81<br>56 | 8.555<br>2  | 0.852<br>3 | 23.149<br>0 | 8.0504      | 0.9519 | 0.1787 |
| <b>124</b> | 220 | 0.4 | 1.000<br>2 | 1.001<br>7 | 10.00<br>00 | 0.080<br>0 | 23.81<br>56 | 8.555<br>2  | 0.852<br>3 | 23.608<br>5 | 7.9027      | 0.9906 | 0.2340 |
| <b>125</b> | 220 | 0.3 | 1.000<br>2 | 1.001<br>7 | 10.00<br>00 | 0.080<br>0 | 23.85<br>91 | 8.588<br>6  | 0.825<br>9 | 22.868<br>1 | 7.6531      | 1.0384 | 0.3368 |
| <b>126</b> | 220 | 0.2 | 1.000<br>2 | 1.001<br>7 | 10.00<br>00 | 0.080<br>0 | 24.02<br>15 | 8.569<br>7  | 0.764<br>0 | 22.664<br>7 | 7.2701      | 1.1547 | 0.5221 |
| <b>127</b> | 230 | 0.7 | 1.000      | 1.001      | 10.00       | 0.080      | 23.95       | 8.481       | 0.885      | 23.047      | 7.9275      | 0.9889 | 0.1977 |

|            |     |     |            |            |             |            |             |            |            |             |        |        |        |
|------------|-----|-----|------------|------------|-------------|------------|-------------|------------|------------|-------------|--------|--------|--------|
|            |     |     | 2          | 7          | 00          | 0          | 62          | 4          | 9          | 3           |        |        |        |
| <b>128</b> | 230 | 0.6 | 1.000<br>2 | 1.001<br>7 | 10.00<br>00 | 0.080<br>0 | 23.89<br>21 | 8.474<br>5 | 0.878<br>5 | 23.128<br>2 | 7.9371 | 1.0048 | 0.2192 |
| <b>129</b> | 230 | 0.5 | 1.000<br>2 | 1.001<br>7 | 10.00<br>00 | 0.080<br>0 | 23.81<br>56 | 8.555<br>2 | 0.852<br>3 | 22.934<br>0 | 7.7698 | 1.0501 | 0.2845 |
| <b>130</b> | 230 | 0.4 | 1.000<br>2 | 1.001<br>7 | 10.00<br>00 | 0.080<br>0 | 23.81<br>56 | 8.555<br>2 | 0.852<br>3 | 23.436<br>8 | 7.5664 | 1.1161 | 0.3714 |
| <b>131</b> | 230 | 0.3 | 1.000<br>2 | 1.001<br>7 | 10.00<br>00 | 0.080<br>0 | 23.85<br>91 | 8.588<br>6 | 0.825<br>9 | 22.540<br>9 | 7.2095 | 1.1883 | 0.5121 |
| <b>132</b> | 230 | 0.2 | 1.000<br>2 | 1.001<br>7 | 10.00<br>00 | 0.080<br>0 | 24.02<br>15 | 8.569<br>7 | 0.764<br>0 | 22.032<br>9 | 6.5939 | 1.3721 | 0.7841 |
| <b>133</b> | 240 | 0.7 | 1.000<br>2 | 1.001<br>7 | 10.00<br>00 | 0.080<br>0 | 23.95<br>62 | 8.481<br>4 | 0.885<br>9 | 22.829<br>7 | 7.6373 | 1.0866 | 0.3090 |
| <b>134</b> | 240 | 0.6 | 1.000<br>2 | 1.001<br>7 | 10.00<br>00 | 0.080<br>0 | 23.89<br>21 | 8.474<br>5 | 0.878<br>5 | 22.859<br>7 | 7.6164 | 1.1075 | 0.3449 |
| <b>135</b> | 240 | 0.5 | 1.000<br>2 | 1.001<br>7 | 10.00<br>00 | 0.080<br>0 | 23.81<br>56 | 8.555<br>2 | 0.852<br>3 | 22.663<br>5 | 7.4010 | 1.1844 | 0.4359 |
| <b>136</b> | 240 | 0.4 | 1.000<br>2 | 1.001<br>7 | 10.00<br>00 | 0.080<br>0 | 23.81<br>56 | 8.555<br>2 | 0.852<br>3 | 22.517<br>5 | 7.1155 | 1.2804 | 0.5525 |
| <b>137</b> | 240 | 0.3 | 1.000<br>2 | 1.001<br>7 | 10.00<br>00 | 0.080<br>0 | 23.85<br>91 | 8.588<br>6 | 0.825<br>9 | 22.012<br>6 | 6.5926 | 1.3919 | 0.7542 |
| <b>138</b> | 240 | 0.2 | 1.000<br>2 | 1.001<br>7 | 10.00<br>00 | 0.080<br>0 | 24.02<br>15 | 8.569<br>7 | 0.764<br>0 | 21.281<br>0 | 5.7053 | 1.6789 | 1.1271 |
| <b>139</b> | 250 | 0.7 | 1.000<br>2 | 1.001<br>7 | 10.00<br>00 | 0.080<br>0 | 23.95<br>62 | 8.481<br>4 | 0.885<br>9 | 22.449<br>2 | 7.2782 | 1.1941 | 0.4486 |
| <b>140</b> | 250 | 0.6 | 1.000<br>2 | 1.001<br>7 | 10.00<br>00 | 0.080<br>0 | 23.89<br>21 | 8.474<br>5 | 0.878<br>5 | 22.527<br>8 | 7.2016 | 1.2531 | 0.5126 |
| <b>141</b> | 250 | 0.5 | 1.000<br>2 | 1.001<br>7 | 10.00<br>00 | 0.080<br>0 | 23.81<br>56 | 8.555<br>2 | 0.852<br>3 | 22.186<br>6 | 6.8944 | 1.3496 | 0.6280 |

|            |     |     |            |            |             |            |             |            |            |             |        |        |        |
|------------|-----|-----|------------|------------|-------------|------------|-------------|------------|------------|-------------|--------|--------|--------|
| <b>142</b> | 250 | 0.4 | 1.000<br>2 | 1.001<br>7 | 10.00<br>00 | 0.080<br>0 | 23.81<br>56 | 8.555<br>2 | 0.852<br>3 | 21.990<br>5 | 6.5179 | 1.4779 | 0.7940 |
| <b>143</b> | 250 | 0.3 | 1.000<br>2 | 1.001<br>7 | 10.00<br>00 | 0.080<br>0 | 23.85<br>91 | 8.588<br>6 | 0.825<br>9 | 21.364<br>8 | 5.8472 | 1.6505 | 1.0493 |
| <b>144</b> | 250 | 0.2 | 1.000<br>2 | 1.001<br>7 | 10.00<br>00 | 0.080<br>0 | 24.02<br>15 | 8.569<br>7 | 0.764<br>0 | 20.391<br>8 | 4.7508 | 1.9806 | 1.4958 |
| <b>145</b> | 260 | 0.7 | 1.000<br>2 | 1.001<br>7 | 10.00<br>00 | 0.080<br>0 | 23.95<br>62 | 8.481<br>4 | 0.885<br>9 | 22.280<br>4 | 6.9234 | 1.3520 | 0.6173 |
| <b>146</b> | 260 | 0.6 | 1.000<br>2 | 1.001<br>7 | 10.00<br>00 | 0.080<br>0 | 23.89<br>21 | 8.474<br>5 | 0.878<br>5 | 22.044<br>7 | 6.7020 | 1.4120 | 0.7052 |
| <b>147</b> | 260 | 0.5 | 1.000<br>2 | 1.001<br>7 | 10.00<br>00 | 0.080<br>0 | 23.81<br>56 | 8.555<br>2 | 0.852<br>3 | 21.762<br>4 | 6.3559 | 1.5370 | 0.8444 |
| <b>148</b> | 260 | 0.4 | 1.000<br>2 | 1.001<br>7 | 10.00<br>00 | 0.080<br>0 | 23.81<br>56 | 8.555<br>2 | 0.852<br>3 | 21.432<br>2 | 5.8775 | 1.6871 | 1.0413 |
| <b>149</b> | 260 | 0.3 | 1.000<br>2 | 1.001<br>7 | 10.00<br>00 | 0.080<br>0 | 23.85<br>91 | 8.588<br>6 | 0.825<br>9 | 20.710<br>2 | 5.1354 | 1.8776 | 1.3149 |
| <b>150</b> | 260 | 0.2 | 1.000<br>2 | 1.001<br>7 | 10.00<br>00 | 0.080<br>0 | 24.02<br>15 | 8.569<br>7 | 0.764<br>0 | 19.765<br>7 | 4.0504 | 2.2075 | 1.7679 |
| <b>151</b> | 220 | 0.7 | 1.000<br>2 | 1.001<br>7 | 10.00<br>00 | 0.080<br>0 | 13.04<br>99 | 4.102<br>6 | 0.864<br>6 | 12.368<br>7 | 3.9014 | 0.8990 | 0.0984 |
| <b>152</b> | 220 | 0.6 | 1.000<br>2 | 1.001<br>7 | 10.00<br>00 | 0.080<br>0 | 13.04<br>99 | 4.102<br>6 | 0.864<br>6 | 12.292<br>4 | 3.8293 | 0.9214 | 0.1266 |
| <b>153</b> | 220 | 0.5 | 1.000<br>2 | 1.001<br>7 | 10.00<br>00 | 0.080<br>0 | 12.79<br>18 | 4.174<br>9 | 0.853<br>7 | 12.245<br>2 | 3.7663 | 0.9342 | 0.1627 |
| <b>154</b> | 220 | 0.4 | 1.000<br>2 | 1.001<br>7 | 10.00<br>00 | 0.080<br>0 | 12.79<br>18 | 4.174<br>9 | 0.853<br>7 | 12.452<br>8 | 3.7700 | 0.9477 | 0.1751 |
| <b>155</b> | 220 | 0.3 | 1.000<br>2 | 1.001<br>7 | 10.00<br>00 | 0.080<br>0 | 12.91<br>64 | 4.228<br>4 | 0.807<br>0 | 12.253<br>5 | 3.5891 | 0.9668 | 0.2487 |
| <b>156</b> | 220 | 0.2 | 1.000      | 1.001      | 10.00       | 0.080      | 13.09       | 4.264      | 0.757      | 11.927      | 3.3229 | 1.0013 | 0.3578 |

|            |     |     |            |            |             |            |             |            |            |             |        |        |        |
|------------|-----|-----|------------|------------|-------------|------------|-------------|------------|------------|-------------|--------|--------|--------|
|            |     |     | 2          | 7          | 00          | 0          | 45          | 2          | 4          | 9           |        |        |        |
| <b>157</b> | 230 | 0.7 | 1.000<br>2 | 1.001<br>7 | 10.00<br>00 | 0.080<br>0 | 13.04<br>99 | 4.102<br>6 | 0.864<br>6 | 12.219<br>6 | 3.7518 | 0.9408 | 0.1499 |
| <b>158</b> | 230 | 0.6 | 1.000<br>2 | 1.001<br>7 | 10.00<br>00 | 0.080<br>0 | 13.04<br>99 | 4.102<br>6 | 0.864<br>6 | 12.206<br>8 | 3.6770 | 0.9636 | 0.1875 |
| <b>159</b> | 230 | 0.5 | 1.000<br>2 | 1.001<br>7 | 10.00<br>00 | 0.080<br>0 | 12.79<br>18 | 4.174<br>9 | 0.853<br>7 | 12.160<br>0 | 3.6261 | 0.9911 | 0.2225 |
| <b>160</b> | 230 | 0.4 | 1.000<br>2 | 1.001<br>7 | 10.00<br>00 | 0.080<br>0 | 12.79<br>18 | 4.174<br>9 | 0.853<br>7 | 12.157<br>8 | 3.5197 | 1.0093 | 0.2578 |
| <b>161</b> | 230 | 0.3 | 1.000<br>2 | 1.001<br>7 | 10.00<br>00 | 0.080<br>0 | 12.91<br>64 | 4.228<br>4 | 0.807<br>0 | 11.995<br>9 | 3.3062 | 1.0493 | 0.3463 |
| <b>162</b> | 230 | 0.2 | 1.000<br>2 | 1.001<br>7 | 10.00<br>00 | 0.080<br>0 | 13.09<br>45 | 4.264<br>2 | 0.757<br>4 | 11.645<br>6 | 2.9711 | 1.1019 | 0.4865 |
| <b>163</b> | 240 | 0.7 | 1.000<br>2 | 1.001<br>7 | 10.00<br>00 | 0.080<br>0 | 13.04<br>99 | 4.102<br>6 | 0.864<br>6 | 12.058<br>3 | 3.5966 | 0.9945 | 0.2151 |
| <b>164</b> | 240 | 0.6 | 1.000<br>2 | 1.001<br>7 | 10.00<br>00 | 0.080<br>0 | 13.04<br>99 | 4.102<br>6 | 0.864<br>6 | 12.016<br>3 | 3.5149 | 1.0288 | 0.2558 |
| <b>165</b> | 240 | 0.5 | 1.000<br>2 | 1.001<br>7 | 10.00<br>00 | 0.080<br>0 | 12.79<br>18 | 4.174<br>9 | 0.853<br>7 | 11.963<br>4 | 3.4135 | 1.0653 | 0.3061 |
| <b>166</b> | 240 | 0.4 | 1.000<br>2 | 1.001<br>7 | 10.00<br>00 | 0.080<br>0 | 12.79<br>18 | 4.174<br>9 | 0.853<br>7 | 11.870<br>5 | 3.2864 | 1.0971 | 0.3538 |
| <b>167</b> | 240 | 0.3 | 1.000<br>2 | 1.001<br>7 | 10.00<br>00 | 0.080<br>0 | 12.91<br>64 | 4.228<br>4 | 0.807<br>0 | 11.720<br>5 | 2.9828 | 1.1561 | 0.4609 |
| <b>168</b> | 240 | 0.2 | 1.000<br>2 | 1.001<br>7 | 10.00<br>00 | 0.080<br>0 | 13.09<br>45 | 4.264<br>2 | 0.757<br>4 | 11.296<br>7 | 2.5965 | 1.2235 | 0.6183 |
| <b>169</b> | 250 | 0.7 | 1.000<br>2 | 1.001<br>7 | 10.00<br>00 | 0.080<br>0 | 13.04<br>99 | 4.102<br>6 | 0.864<br>6 | 11.895<br>5 | 3.4241 | 1.0450 | 0.2816 |
| <b>170</b> | 250 | 0.6 | 1.000<br>2 | 1.001<br>7 | 10.00<br>00 | 0.080<br>0 | 13.04<br>99 | 4.102<br>6 | 0.864<br>6 | 11.837<br>1 | 3.3364 | 1.0909 | 0.3265 |

|            |     |     |            |            |             |            |             |             |            |             |             |        |        |
|------------|-----|-----|------------|------------|-------------|------------|-------------|-------------|------------|-------------|-------------|--------|--------|
| <b>171</b> | 250 | 0.5 | 1.000<br>2 | 1.001<br>7 | 10.00<br>00 | 0.080<br>0 | 12.79<br>18 | 4.174<br>9  | 0.853<br>7 | 11.762<br>0 | 3.2227      | 1.1239 | 0.3808 |
| <b>172</b> | 250 | 0.4 | 1.000<br>2 | 1.001<br>7 | 10.00<br>00 | 0.080<br>0 | 12.79<br>18 | 4.174<br>9  | 0.853<br>7 | 11.654<br>2 | 3.0664      | 1.1553 | 0.4371 |
| <b>173</b> | 250 | 0.3 | 1.000<br>2 | 1.001<br>7 | 10.00<br>00 | 0.080<br>0 | 12.91<br>64 | 4.228<br>4  | 0.807<br>0 | 11.380<br>2 | 2.7695      | 1.2195 | 0.5468 |
| <b>174</b> | 250 | 0.2 | 1.000<br>2 | 1.001<br>7 | 10.00<br>00 | 0.080<br>0 | 13.09<br>45 | 4.264<br>2  | 0.757<br>4 | 11.048<br>0 | 2.3576      | 1.2899 | 0.7073 |
| <b>175</b> | 260 | 0.7 | 1.000<br>2 | 1.001<br>7 | 10.00<br>00 | 0.080<br>0 | 13.04<br>99 | 4.102<br>6  | 0.864<br>6 | 11.739<br>6 | 3.2848      | 1.0866 | 0.3308 |
| <b>176</b> | 260 | 0.6 | 1.000<br>2 | 1.001<br>7 | 10.00<br>00 | 0.080<br>0 | 13.04<br>99 | 4.102<br>6  | 0.864<br>6 | 11.727<br>1 | 3.2006      | 1.1217 | 0.3722 |
| <b>177</b> | 260 | 0.5 | 1.000<br>2 | 1.001<br>7 | 10.00<br>00 | 0.080<br>0 | 12.79<br>18 | 4.174<br>9  | 0.853<br>7 | 11.627<br>5 | 3.0665      | 1.1568 | 0.4239 |
| <b>178</b> | 260 | 0.4 | 1.000<br>2 | 1.001<br>7 | 10.00<br>00 | 0.080<br>0 | 12.79<br>18 | 4.174<br>9  | 0.853<br>7 | 11.594<br>0 | 2.9437      | 1.2055 | 0.4800 |
| <b>179</b> | 260 | 0.3 | 1.000<br>2 | 1.001<br>7 | 10.00<br>00 | 0.080<br>0 | 12.91<br>64 | 4.228<br>4  | 0.807<br>0 | 11.396<br>0 | 2.6932      | 1.2454 | 0.5787 |
| <b>180</b> | 260 | 0.2 | 1.000<br>2 | 1.001<br>7 | 10.00<br>00 | 0.080<br>0 | 13.09<br>45 | 4.264<br>2  | 0.757<br>4 | 11.000<br>3 | 2.3508      | 1.2939 | 0.7097 |
| <b>181</b> | 220 | 0.6 | 1.000<br>0 | 0.000<br>0 | 5.000<br>0  | 0.035<br>0 | 47.05<br>51 | 15.40<br>21 | 2.879<br>5 | 44.841<br>9 | 14.200<br>1 | 2.7966 | 0.0001 |
| <b>182</b> | 220 | 0.5 | 1.000<br>0 | 0.000<br>0 | 5.000<br>0  | 0.035<br>0 | 46.17<br>78 | 15.34<br>84 | 2.851<br>2 | 44.532<br>6 | 13.969<br>1 | 2.8062 | 0.0002 |
| <b>183</b> | 220 | 0.4 | 1.000<br>0 | 0.000<br>0 | 5.000<br>0  | 0.035<br>0 | 48.98<br>91 | 16.06<br>47 | 2.939<br>0 | 46.938<br>7 | 15.025<br>0 | 2.8546 | 0.0003 |
| <b>184</b> | 230 | 0.6 | 1.000<br>0 | 0.000<br>0 | 5.000<br>0  | 0.035<br>0 | 47.05<br>51 | 15.40<br>21 | 2.879<br>5 | 43.977<br>3 | 13.819<br>7 | 2.8461 | 0.0006 |
| <b>185</b> | 230 | 0.5 | 1.000      | 0.000      | 5.000       | 0.035      | 46.17       | 15.34       | 2.851      | 43.052      | 13.519      | 2.8316 | 0.0009 |



|            |     |     |            |            |            |            |             |             |            |             |             |        |        |
|------------|-----|-----|------------|------------|------------|------------|-------------|-------------|------------|-------------|-------------|--------|--------|
|            |     |     | 0          | 0          | 0          | 0          | 78          | 84          | 2          | 3           | 6           |        |        |
| <b>186</b> | 230 | 0.4 | 1.000<br>0 | 0.000<br>0 | 5.000<br>0 | 0.035<br>0 | 48.98<br>91 | 16.06<br>47 | 2.939<br>0 | 45.818<br>3 | 14.355<br>0 | 2.8908 | 0.0007 |
| <b>187</b> | 240 | 0.6 | 1.000<br>0 | 0.000<br>0 | 5.000<br>0 | 0.035<br>0 | 47.05<br>51 | 15.40<br>21 | 2.879<br>5 | 43.001<br>2 | 13.187<br>8 | 2.9384 | 0.0019 |
| <b>188</b> | 240 | 0.5 | 1.000<br>0 | 0.000<br>0 | 5.000<br>0 | 0.035<br>0 | 46.17<br>78 | 15.34<br>84 | 2.851<br>2 | 42.036<br>8 | 12.817<br>3 | 2.9077 | 0.0023 |
| <b>189</b> | 240 | 0.4 | 1.000<br>0 | 0.000<br>0 | 5.000<br>0 | 0.035<br>0 | 48.98<br>91 | 16.06<br>47 | 2.939<br>0 | 44.645<br>4 | 13.638<br>9 | 2.9838 | 0.0022 |
| <b>190</b> | 250 | 0.6 | 1.000<br>0 | 0.000<br>0 | 5.000<br>0 | 0.035<br>0 | 47.05<br>51 | 15.40<br>21 | 2.879<br>5 | 42.493<br>6 | 12.756<br>0 | 3.0240 | 0.0046 |
| <b>191</b> | 250 | 0.5 | 1.000<br>0 | 0.000<br>0 | 5.000<br>0 | 0.035<br>0 | 46.17<br>78 | 15.34<br>84 | 2.851<br>2 | 41.502<br>4 | 12.368<br>9 | 2.9719 | 0.0047 |
| <b>192</b> | 250 | 0.4 | 1.000<br>0 | 0.000<br>0 | 5.000<br>0 | 0.035<br>0 | 48.98<br>91 | 16.06<br>47 | 2.939<br>0 | 43.984<br>8 | 13.123<br>8 | 3.0763 | 0.0048 |
| <b>193</b> | 260 | 0.6 | 1.000<br>0 | 0.000<br>0 | 5.000<br>0 | 0.035<br>0 | 47.05<br>51 | 15.40<br>21 | 2.879<br>5 | 42.337<br>7 | 12.666<br>5 | 3.0152 | 0.0079 |
| <b>194</b> | 260 | 0.5 | 1.000<br>0 | 0.000<br>0 | 5.000<br>0 | 0.035<br>0 | 46.17<br>78 | 15.34<br>84 | 2.851<br>2 | 41.692<br>5 | 12.472<br>9 | 3.0318 | 0.0110 |
| <b>195</b> | 260 | 0.4 | 1.000<br>0 | 0.000<br>0 | 5.000<br>0 | 0.035<br>0 | 48.98<br>91 | 16.06<br>47 | 2.939<br>0 | 43.583<br>2 | 12.868<br>9 | 3.0323 | 0.0105 |
| <b>196</b> | 220 | 0.6 | 1.000<br>0 | 0.000<br>0 | 5.000<br>0 | 0.035<br>0 | 28.90<br>52 | 8.083<br>7  | 2.804<br>9 | 28.474<br>0 | 7.7887      | 2.7664 | 0.0003 |
| <b>197</b> | 220 | 0.5 | 1.000<br>0 | 0.000<br>0 | 5.000<br>0 | 0.035<br>0 | 30.54<br>46 | 8.450<br>3  | 2.946<br>4 | 28.890<br>5 | 7.7596      | 2.8427 | 0.0003 |
| <b>198</b> | 220 | 0.4 | 1.000<br>0 | 0.000<br>0 | 5.000<br>0 | 0.035<br>0 | 30.46<br>74 | 8.530<br>7  | 2.946<br>0 | 28.482<br>3 | 7.5844      | 2.8395 | 0.0003 |
| <b>199</b> | 230 | 0.6 | 1.000<br>0 | 0.000<br>0 | 5.000<br>0 | 0.035<br>0 | 28.90<br>52 | 8.083<br>7  | 2.804<br>9 | 28.153<br>0 | 7.5237      | 2.8023 | 0.0004 |

|            |     |     |            |            |            |            |             |            |            |             |        |        |        |
|------------|-----|-----|------------|------------|------------|------------|-------------|------------|------------|-------------|--------|--------|--------|
| <b>200</b> | 230 | 0.5 | 1.000<br>0 | 0.000<br>0 | 5.000<br>0 | 0.035<br>0 | 30.54<br>46 | 8.450<br>3 | 2.946<br>4 | 28.349<br>1 | 7.4634 | 2.8762 | 0.0008 |
| <b>201</b> | 230 | 0.4 | 1.000<br>0 | 0.000<br>0 | 5.000<br>0 | 0.035<br>0 | 30.46<br>74 | 8.530<br>7 | 2.946<br>0 | 27.940<br>0 | 7.2329 | 2.8746 | 0.0010 |
| <b>202</b> | 240 | 0.6 | 1.000<br>0 | 0.000<br>0 | 5.000<br>0 | 0.035<br>0 | 28.90<br>52 | 8.083<br>7 | 2.804<br>9 | 27.909<br>3 | 7.3213 | 2.8626 | 0.0011 |
| <b>203</b> | 240 | 0.5 | 1.000<br>0 | 0.000<br>0 | 5.000<br>0 | 0.035<br>0 | 30.54<br>46 | 8.450<br>3 | 2.946<br>4 | 27.906<br>0 | 7.2056 | 2.9005 | 0.0013 |
| <b>204</b> | 240 | 0.4 | 1.000<br>0 | 0.000<br>0 | 5.000<br>0 | 0.035<br>0 | 30.46<br>74 | 8.530<br>7 | 2.946<br>0 | 27.459<br>2 | 6.9622 | 2.8912 | 0.0021 |
| <b>205</b> | 250 | 0.6 | 1.000<br>0 | 0.000<br>0 | 5.000<br>0 | 0.035<br>0 | 28.90<br>52 | 8.083<br>7 | 2.804<br>9 | 27.717<br>8 | 7.1975 | 2.8495 | 0.0019 |
| <b>206</b> | 250 | 0.5 | 1.000<br>0 | 0.000<br>0 | 5.000<br>0 | 0.035<br>0 | 30.54<br>46 | 8.450<br>3 | 2.946<br>4 | 27.784<br>6 | 7.1309 | 2.8957 | 0.0028 |
| <b>207</b> | 250 | 0.4 | 1.000<br>0 | 0.000<br>0 | 5.000<br>0 | 0.035<br>0 | 30.46<br>74 | 8.530<br>7 | 2.946<br>0 | 27.440<br>9 | 6.9693 | 2.9172 | 0.0036 |
| <b>208</b> | 260 | 0.6 | 1.000<br>0 | 0.000<br>0 | 5.000<br>0 | 0.035<br>0 | 28.90<br>52 | 8.083<br>7 | 2.804<br>9 | 28.044<br>0 | 7.2673 | 2.8757 | 0.0042 |
| <b>209</b> | 260 | 0.5 | 1.000<br>0 | 0.000<br>0 | 5.000<br>0 | 0.035<br>0 | 30.54<br>46 | 8.450<br>3 | 2.946<br>4 | 28.046<br>1 | 7.2726 | 2.8987 | 0.0046 |
| <b>210</b> | 260 | 0.4 | 1.000<br>0 | 0.000<br>0 | 5.000<br>0 | 0.035<br>0 | 30.46<br>74 | 8.530<br>7 | 2.946<br>0 | 27.748<br>3 | 7.1680 | 2.8900 | 0.0061 |
| <b>211</b> | 220 | 0.6 | 1.000<br>0 | 0.000<br>0 | 5.000<br>0 | 0.035<br>0 | 20.35<br>88 | 4.086<br>5 | 2.926<br>2 | 19.381<br>1 | 3.8319 | 2.7550 | 0.0000 |
| <b>212</b> | 220 | 0.5 | 1.000<br>0 | 0.000<br>0 | 5.000<br>0 | 0.035<br>0 | 20.39<br>61 | 4.048<br>9 | 2.885<br>5 | 19.451<br>1 | 3.7850 | 2.7645 | 0.0000 |
| <b>213</b> | 220 | 0.4 | 1.000<br>0 | 0.000<br>0 | 5.000<br>0 | 0.035<br>0 | 20.45<br>05 | 4.081<br>4 | 2.744<br>2 | 19.272<br>2 | 3.6935 | 2.6407 | 0.0000 |
| <b>214</b> | 230 | 0.6 | 1.000      | 0.000      | 5.000      | 0.035      | 20.35       | 4.086      | 2.926      | 19.240      | 3.7343 | 2.7535 | 0.0000 |

|            |     |     |            |            |            |            |             |             |            |             |             |        |        |
|------------|-----|-----|------------|------------|------------|------------|-------------|-------------|------------|-------------|-------------|--------|--------|
|            |     |     | 0          | 0          | 0          | 0          | 88          | 5           | 2          | 1           |             |        |        |
| <b>215</b> | 230 | 0.5 | 1.000<br>0 | 0.000<br>0 | 5.000<br>0 | 0.035<br>0 | 20.39<br>61 | 4.048<br>9  | 2.885<br>5 | 19.307<br>9 | 3.7063      | 2.7876 | 0.0001 |
| <b>216</b> | 230 | 0.4 | 1.000<br>0 | 0.000<br>0 | 5.000<br>0 | 0.035<br>0 | 20.45<br>05 | 4.081<br>4  | 2.744<br>2 | 19.095<br>7 | 3.5794      | 2.6585 | 0.0002 |
| <b>217</b> | 240 | 0.6 | 1.000<br>0 | 0.000<br>0 | 5.000<br>0 | 0.035<br>0 | 20.35<br>88 | 4.086<br>5  | 2.926<br>2 | 19.176<br>3 | 3.6972      | 2.7619 | 0.0002 |
| <b>218</b> | 240 | 0.5 | 1.000<br>0 | 0.000<br>0 | 5.000<br>0 | 0.035<br>0 | 20.39<br>61 | 4.048<br>9  | 2.885<br>5 | 19.193<br>9 | 3.6563      | 2.7724 | 0.0004 |
| <b>219</b> | 240 | 0.4 | 1.000<br>0 | 0.000<br>0 | 5.000<br>0 | 0.035<br>0 | 20.45<br>05 | 4.081<br>4  | 2.744<br>2 | 19.037<br>2 | 3.5557      | 2.6410 | 0.0007 |
| <b>220</b> | 250 | 0.6 | 1.000<br>0 | 0.000<br>0 | 5.000<br>0 | 0.035<br>0 | 20.35<br>88 | 4.086<br>5  | 2.926<br>2 | 19.201<br>3 | 3.7195      | 2.7526 | 0.0007 |
| <b>221</b> | 250 | 0.5 | 1.000<br>0 | 0.000<br>0 | 5.000<br>0 | 0.035<br>0 | 20.39<br>61 | 4.048<br>9  | 2.885<br>5 | 19.315<br>4 | 3.7010      | 2.7806 | 0.0009 |
| <b>222</b> | 250 | 0.4 | 1.000<br>0 | 0.000<br>0 | 5.000<br>0 | 0.035<br>0 | 20.45<br>05 | 4.081<br>4  | 2.744<br>2 | 19.164<br>6 | 3.6435      | 2.6339 | 0.0013 |
| <b>223</b> | 260 | 0.6 | 1.000<br>0 | 0.000<br>0 | 5.000<br>0 | 0.035<br>0 | 20.35<br>88 | 4.086<br>5  | 2.926<br>2 | 19.363<br>0 | 3.8358      | 2.7351 | 0.0011 |
| <b>224</b> | 260 | 0.5 | 1.000<br>0 | 0.000<br>0 | 5.000<br>0 | 0.035<br>0 | 20.39<br>61 | 4.048<br>9  | 2.885<br>5 | 19.454<br>5 | 3.8211      | 2.7394 | 0.0014 |
| <b>225</b> | 260 | 0.4 | 1.000<br>0 | 0.000<br>0 | 5.000<br>0 | 0.035<br>0 | 20.45<br>05 | 4.081<br>4  | 2.744<br>2 | 19.404<br>3 | 3.7903      | 2.6187 | 0.0019 |
| <b>226</b> | 220 | 0.6 | 1.000<br>0 | 0.000<br>0 | 5.000<br>0 | 0.035<br>0 | 41.49<br>47 | 15.87<br>93 | 0.901<br>6 | 40.380<br>8 | 15.304<br>9 | 0.8354 | 0.0001 |
| <b>227</b> | 220 | 0.5 | 1.000<br>0 | 0.000<br>0 | 5.000<br>0 | 0.035<br>0 | 41.58<br>78 | 15.96<br>64 | 0.918<br>4 | 40.117<br>6 | 15.096<br>2 | 0.8783 | 0.0003 |
| <b>228</b> | 220 | 0.4 | 1.000<br>0 | 0.000<br>0 | 5.000<br>0 | 0.035<br>0 | 42.02<br>74 | 16.16<br>33 | 0.933<br>9 | 40.272<br>1 | 15.150<br>0 | 0.8998 | 0.0007 |

|            |     |     |            |            |            |            |             |             |            |             |             |        |        |
|------------|-----|-----|------------|------------|------------|------------|-------------|-------------|------------|-------------|-------------|--------|--------|
| <b>229</b> | 230 | 0.6 | 1.000<br>0 | 0.000<br>0 | 5.000<br>0 | 0.035<br>0 | 41.49<br>47 | 15.87<br>93 | 0.901<br>6 | 39.922<br>4 | 15.044<br>9 | 0.8529 | 0.0006 |
| <b>230</b> | 230 | 0.5 | 1.000<br>0 | 0.000<br>0 | 5.000<br>0 | 0.035<br>0 | 41.58<br>78 | 15.96<br>64 | 0.918<br>4 | 39.452<br>1 | 14.780<br>5 | 0.8975 | 0.0011 |
| <b>231</b> | 230 | 0.4 | 1.000<br>0 | 0.000<br>0 | 5.000<br>0 | 0.035<br>0 | 42.02<br>74 | 16.16<br>33 | 0.933<br>9 | 39.502<br>1 | 14.689<br>2 | 0.9109 | 0.0022 |
| <b>232</b> | 240 | 0.6 | 1.000<br>0 | 0.000<br>0 | 5.000<br>0 | 0.035<br>0 | 41.49<br>47 | 15.87<br>93 | 0.901<br>6 | 39.146<br>1 | 14.580<br>1 | 0.8706 | 0.0017 |
| <b>233</b> | 240 | 0.5 | 1.000<br>0 | 0.000<br>0 | 5.000<br>0 | 0.035<br>0 | 41.58<br>78 | 15.96<br>64 | 0.918<br>4 | 38.648<br>6 | 14.328<br>1 | 0.9101 | 0.0026 |
| <b>234</b> | 240 | 0.4 | 1.000<br>0 | 0.000<br>0 | 5.000<br>0 | 0.035<br>0 | 42.02<br>74 | 16.16<br>33 | 0.933<br>9 | 38.842<br>8 | 14.242<br>1 | 0.9441 | 0.0045 |
| <b>235</b> | 250 | 0.6 | 1.000<br>0 | 0.000<br>0 | 5.000<br>0 | 0.035<br>0 | 41.49<br>47 | 15.87<br>93 | 0.901<br>6 | 38.425<br>8 | 14.200<br>2 | 0.8956 | 0.0039 |
| <b>236</b> | 250 | 0.5 | 1.000<br>0 | 0.000<br>0 | 5.000<br>0 | 0.035<br>0 | 41.58<br>78 | 15.96<br>64 | 0.918<br>4 | 38.067<br>6 | 13.984<br>0 | 0.9377 | 0.0051 |
| <b>237</b> | 250 | 0.4 | 1.000<br>0 | 0.000<br>0 | 5.000<br>0 | 0.035<br>0 | 42.02<br>74 | 16.16<br>33 | 0.933<br>9 | 38.483<br>5 | 13.980<br>6 | 0.9656 | 0.0075 |
| <b>238</b> | 260 | 0.6 | 1.000<br>0 | 0.000<br>0 | 5.000<br>0 | 0.035<br>0 | 41.49<br>47 | 15.87<br>93 | 0.901<br>6 | 38.111<br>8 | 13.956<br>2 | 0.9152 | 0.0058 |
| <b>239</b> | 260 | 0.5 | 1.000<br>0 | 0.000<br>0 | 5.000<br>0 | 0.035<br>0 | 41.58<br>78 | 15.96<br>64 | 0.918<br>4 | 37.726<br>1 | 13.781<br>3 | 0.9699 | 0.0093 |
| <b>240</b> | 260 | 0.4 | 1.000<br>0 | 0.000<br>0 | 5.000<br>0 | 0.035<br>0 | 42.02<br>74 | 16.16<br>33 | 0.933<br>9 | 38.454<br>8 | 13.879<br>8 | 0.9923 | 0.0136 |

## Section 4.4 Optimization results

The reaction rate profiles for optimization cases A2, B1 and B2, along with the respective reference cases are presented here (Figures 4 to 6) complementary to the results in Section 4.4. At optimal conditions, increased reaction rates along the reactor coordinate can be observed in each case. These results resemble the ones obtained for optimization case A1, which were previously discussed in Section 4.4.1.1.

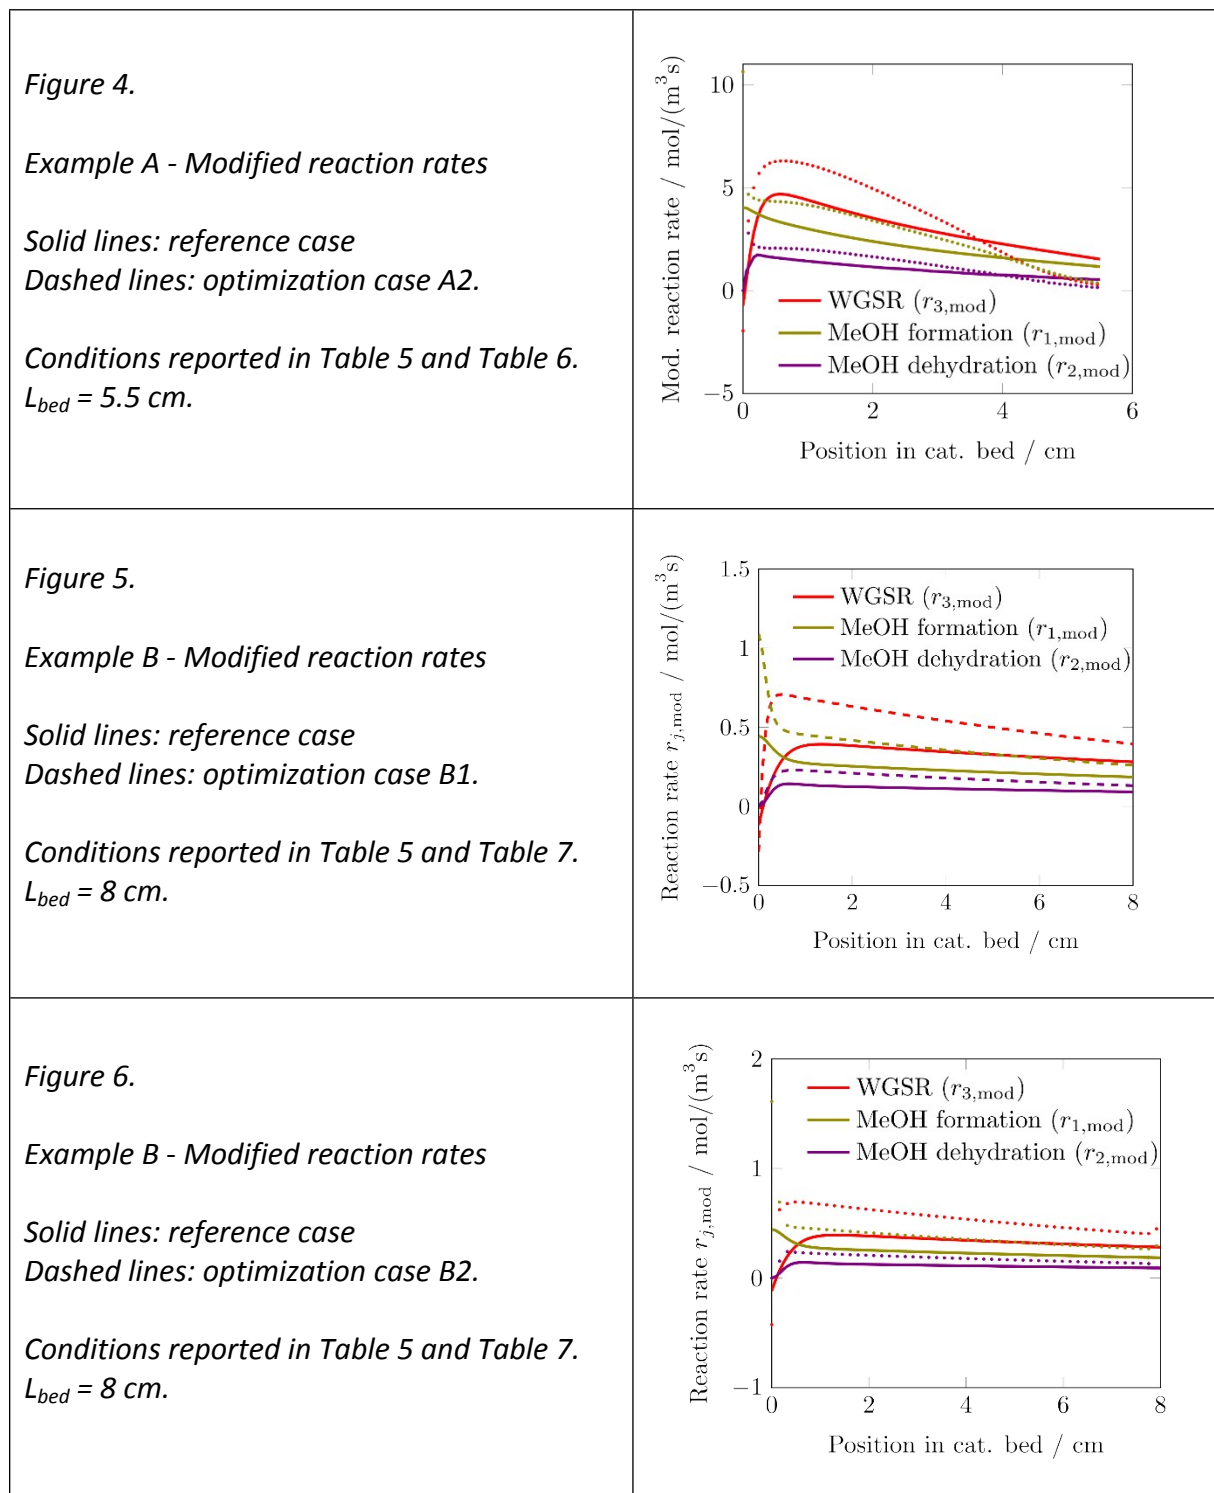

Supplement: d0re00041h1.pdf [file d0re00041h1.pdf]
